# Supplementary material for: Coarsening dynamics can explain meiotic crossover patterning in both the presence and absence of the synaptonemal complex
Source: eLife journal article supplement (doi:10.7554/elife.79408), 2023-02-27
Supplement: supp [file elife-79408-supp-v1.zip]

Archive with 10 entries (10 files):
- elife_poa_e79408_Figure_1_figure_supplement_1.pdf
- elife_poa_e79408_Figure_2_figure_supplement_1.pdf
- elife_poa_e79408_Figure_2_figure_supplement_2.pdf
- elife_poa_e79408_Figure_3_figure_supplement_1.pdf
- elife_poa_e79408_Figure_4_figure_supplement_1.pdf
- elife_poa_e79408_Figure_4_figure_supplement_2.pdf
- elife_poa_e79408_Figure_5_figure_supplement_1.pdf
- elife_poa_e79408_Figure_1_source_data_1.xlsx
- elife_poa_e79408_Figure_4_figure_supplement_1_source_data_1.xlsx
- elife_poa_e79408_Figure_5_figure_supplement_1_source_data_1.xlsx
