# Supplementary material for: Coarsening dynamics can explain meiotic crossover patterning in both the presence and absence of the synaptonemal complex
Source: eLife journal article supplement (doi:10.7554/elife.79408), 2023-02-27
Supplement: supp [file elife-79408-supp-v1.zip › elife_poa_e79408_Figure_1_source_data_1.xlsx]

## Sheet: Figure 1 - source data 1
	0.14 s-1	RI HEI10 absorption rate
	0.03 s-1	RI HEI10 escape rate
	1.25	Escape rate Hill coefficient
	1 au	Hill function threshold
	0.5 au	Smooth switchoff threshold
	10 au-1	Smooth switchoff sharpness
	0.3	Telomere length (fraction of chromosome pair)
	1.25	Telomere weighting for RI loading
	0.5 µm-1	Average RI density along chromosome pairs
	0.76	Proportion of initial HEI10 loaded at RIs
	0.24	Proportion of initial HEI10 in nucleoplasmic pool
	1170 au	Mean initial total cellular HEI10 amount
	75 au	Standard deviation of total initial HEI10 amount
	0.33	Relative noise in HEI10 RI loading
	36000 s	Simulation duration
	5	Number of chromosome pairs
