# Supplementary material for: Coarsening dynamics can explain meiotic crossover patterning in both the presence and absence of the synaptonemal complex
Source: eLife journal article supplement (doi:10.7554/elife.79408), 2023-02-27
Supplement: supp [file elife-79408-supp-v1.zip › elife_poa_e79408_Figure_4_figure_supplement_1.pdf]

A

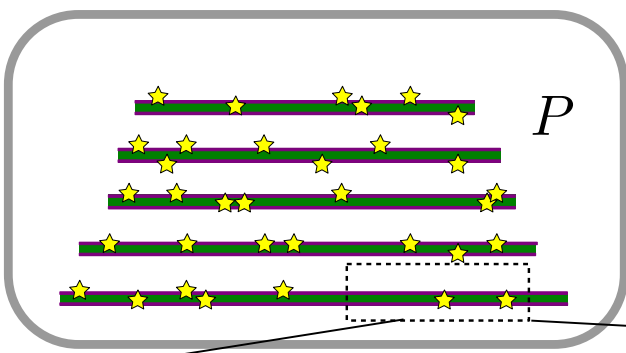

B

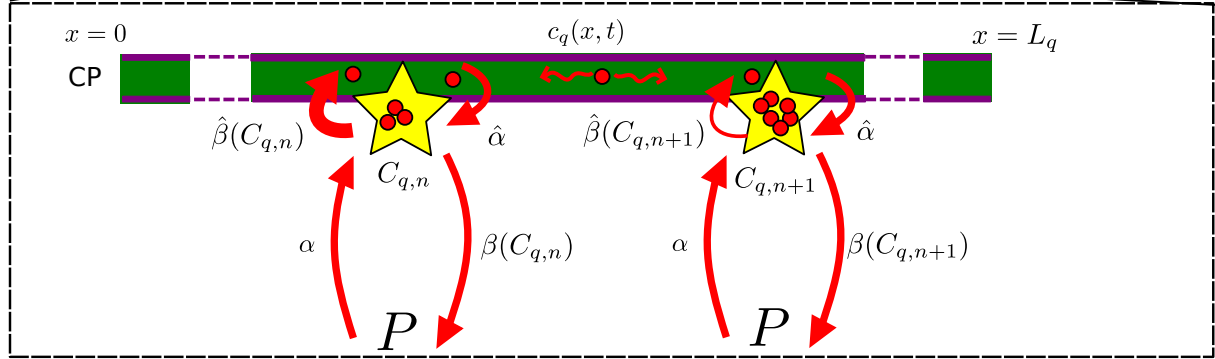

C

Equation System

SCs 
$$\frac{\partial c_q}{\partial t} = D \frac{\partial^2 c_q}{\partial x^2} + \sum_{n=1}^{N_q} H_s(C_{q,n} - K_H) \left( \hat{\beta}(C_{q,n}) C_{q,n} - \hat{\alpha} c_q(x_{q,n}) \right) \delta(x - x_{q,n}), \quad 1 \leq q \leq Q, 0 \leq x \leq L_q,$$

RIs 
$$\frac{dC_{q,n}}{dt} = H_s(C_{q,n} - K_H) \left\{ \alpha P - \beta(C_{q,n}) C_{q,n} + \hat{\alpha} c_q(x_{q,n}) - \hat{\beta}(C_{q,n}) C_{q,n} \right\}, \quad 1 \leq q \leq Q, 1 \leq n \leq N_q,$$

Nucleoplasm 
$$\frac{dP}{dt} = \sum_{q=1}^Q \sum_{n=1}^{N_q} H_s(C_{q,n} - K_H) \{ \beta(C_{q,n}) C_{q,n} - \alpha P \},$$

Boundary conditions at SC ends 
$$\frac{\partial c_q}{\partial x} = 0 \quad \text{at } x = 0 \text{ and } x = L_q, \quad 1 \leq q \leq Q.$$

Function definitions 
$$\beta(C_{q,n}) = \frac{\beta_C}{1 + (C_{q,n}/K_C)^\gamma}, \quad \hat{\beta}(C_{q,n}) = \frac{\hat{\beta}_C}{1 + (C_{q,n}/K_C)^\gamma}, \quad H_s(s) = \frac{1}{2} (\tanh(sK_s) + 1),$$

Initial conditions 
$$F = \mathcal{N}_T(\mu_F, \sigma_F^2, -3, 3), \quad \hat{C}_{q,n} = f(x_{q,n}/L_q) \mathcal{N}_T(1, \sigma_C^2, -3, 3),$$

$$C_{q,n}(t=0) = R_{RI} F \frac{\hat{C}_{q,n}}{\sum_{q'=1}^Q \sum_{n'=1}^{N_{q'}} \hat{C}_{q',n'}}, \quad c_q(t=0) = \frac{R_{SC} F}{\sum_{q'=1}^Q L_{q'}}, \quad P(t=0) = 0$$

D

|                 | WT    | WT+nuc | Unit                         | Description                                      |
|-----------------|-------|--------|------------------------------|--------------------------------------------------|
| $D$             | 1.1   | 1.1    | $\mu\text{m}^2\text{s}^{-1}$ | HEI10 diffusion coefficient on SC                |
| $\alpha$        | 0     | 0.014  | $\text{s}^{-1}$              | RI HEI10 absorption rate from nucleoplasm        |
| $\beta_C$       | 0     | 0.003  | $\text{s}^{-1}$              | RI HEI10 escape rate into nucleoplasm            |
| $\hat{\alpha}$  | 2.1   | 1.89   | $\mu\text{m}\text{s}^{-1}$   | RI HEI10 absorption rate from SC                 |
| $\hat{\beta}_C$ | 0.5   | 0.45   | $\text{s}^{-1}$              | RI HEI10 escape rate onto SC                     |
| $\gamma$        | 1.25  | 1.25   |                              | Escape rate Hill coefficient                     |
| $K_C$           | 1     | 1      | au                           | Hill function threshold                          |
| $K_H$           | 0.5   | 0.5    | au                           | Smooth switchoff threshold                       |
| $K_s$           | 10    | 10     | $\text{au}^{-1}$             | Smooth switchoff sharpness                       |
| $x_e$           | 0.1   | 0.1    |                              | Telomere length (fraction of chromosome pair)    |
| $f_e$           | 2.0   | 2.0    |                              | Telomere weighting for RI loading                |
| $\rho$          | 0.5   | 0.5    | $\mu\text{m}^{-1}$           | Average RI density along chromosome pairs        |
| $R_{RI}$        | 0.76  | 0.76   |                              | Proportion of initial HEI10 loaded at RIs        |
| $R_{SC}$        | 0.24  | 0.24   |                              | Proportion of initial HEI10 on SCs               |
| $\mu_F$         | 1170  | 1170   | au                           | Mean initial total cellular HEI10 amount         |
| $\sigma_F$      | 75    | 75     | au                           | Standard deviation of total initial HEI10 amount |
| $\sigma_C$      | 0.33  | 0.33   | au                           | Relative noise in HEI10 RI loading               |
| $T$             | 36000 | 36000  | s                            | Simulation duration                              |
| $Q$             | 5     | 5      |                              | Number of chromosome pairs                       |

E

|           |                                                                  |
|-----------|------------------------------------------------------------------|
| $L_q$     | Length of the $q$ -th chromosome pair                            |
| $P$       | Amount of HEI10 in nucleoplasmic pool                            |
| $C_{q,n}$ | Amount of HEI10 in the $n$ -th RI on the $q$ -th chromosome pair |
| $c_q(x)$  | Amount of HEI10 per unit length on the $q$ -th chromosome pair   |
| $x$       | Distance along the chromosome pair                               |
| $x_{q,n}$ | Distance of $n$ -th RI along the $q$ -th chromosome pair         |
| $q$       | Chromosome pair index $1 \leq q \leq Q$                          |
| $n$       | RI index along chromosome pair                                   |
| $N_q$     | Number of RIs on $q$ -th chromosome pair                         |
