# Supplementary material for: Coarsening dynamics can explain meiotic crossover patterning in both the presence and absence of the synaptonemal complex
Source: eLife journal article supplement (doi:10.7554/elife.79408), 2023-02-27
Supplement: supp [file elife-79408-supp-v1.zip › elife_poa_e79408_Figure_4_figure_supplement_1_source_data_1.xlsx]

## Sheet: Sheet1
	WT	WT+nuc	Unit	Description
	1.1	1.1	µm2s-1	HEI10 diffusion coefficient on SC
	0	0.014	s-1	RI HEI10 absorption rate from nucleoplasm
	0	0.003	s-1	RI HEI10 escape rate into nucleoplasm
	2.1	1.89	µm s-1	RI HEI10 absorption rate from SC
	0.5	0.45	s-1	RI HEI10 escape rate onto SC
	1.25	1.25		Escape rate Hill coefficient
	1	1	au	Hill function threshold
	0.5	0.5	au	Smooth switchoff threshold
	10	10	au-1	Smooth switchoff sharpness
	0.1	0.1		Telomere length (fraction of chromosome pair)
	2	2		Telomere weighting for RI loading
	0.5	0.5	µm-1	Average RI density along chromosome pairs
	0.76	0.76		Proportion of initial HEI10 loaded at RIs
	0.24	0.24		Proportion of initial HEI10 on SCs
	1170	1170	au	Mean initial total cellular HEI10 amount
	75	75	au	Standard deviation of total initial HEI10 amount
	0.33	0.33	au	Relative noise in HEI10 RI loading
	36000	36000	s	Simulation duration
	5	5		Number of chromosome pairs
