# Supplementary material for: Coarsening dynamics can explain meiotic crossover patterning in both the presence and absence of the synaptonemal complex
Source: eLife journal article supplement (doi:10.7554/elife.79408), 2023-02-27
Supplement: supp [file elife-79408-supp-v1.zip › elife_poa_e79408_Figure_5_figure_supplement_1.pdf]

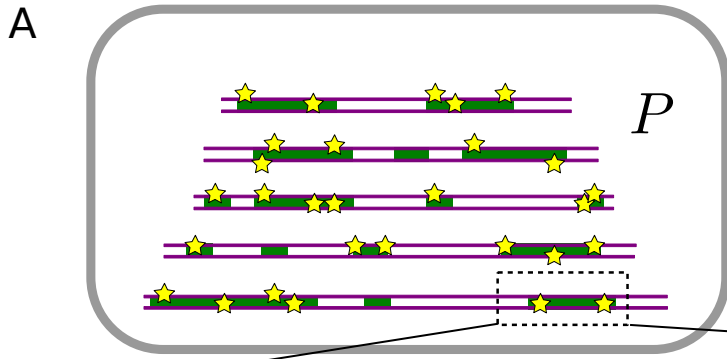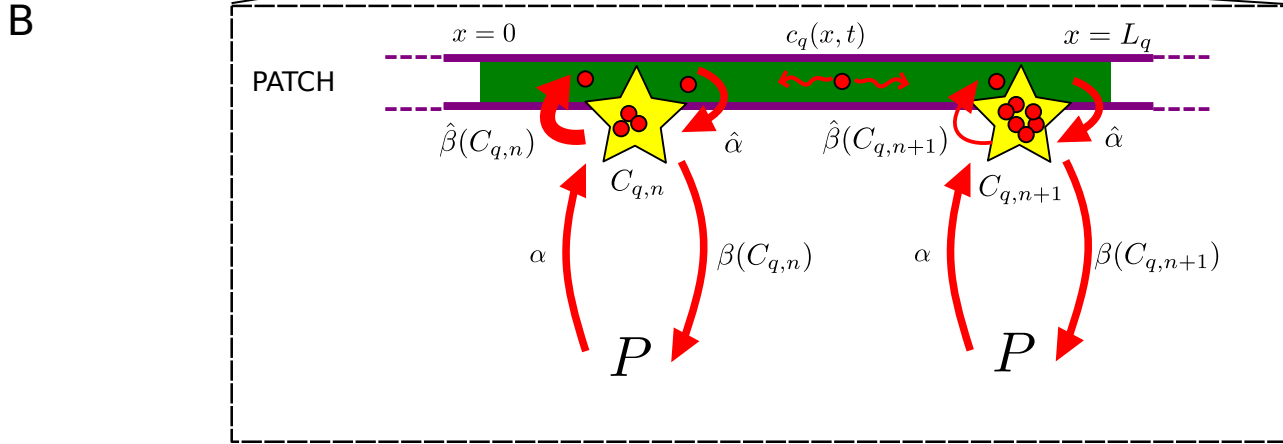

**C**

|                 | Value | Unit           | Description                                        |
|-----------------|-------|----------------|----------------------------------------------------|
| $\alpha$        | 0.014 | $s^{-1}$       | RI HEI10 absorption rate from nucleoplasm          |
| $\beta_C$       | 0.003 | $s^{-1}$       | RI HEI10 escape rate into nucleoplasm              |
| $\hat{\alpha}$  | 0.42  | $\mu m s^{-1}$ | RI HEI10 absorption rate from SC                   |
| $\hat{\beta}_C$ | 0.075 | $s^{-1}$       | RI HEI10 escape rate onto SC                       |
| $f_e$           | 1.0   |                | Telomere weighting for RI loading                  |
| $\mu_Q$         | 13.92 |                | Mean number of SC patches                          |
| $L_\alpha$      | 1.693 |                | Alpha parameter of patch length gamma distribution |
| $L_\theta$      | 2.984 | $\mu m$        | Theta parameter of patch length gamma distribution |
