# Supplementary material for: Coarsening dynamics can explain meiotic crossover patterning in both the presence and absence of the synaptonemal complex
Source: eLife journal article supplement (doi:10.7554/elife.79408), 2023-02-27
Supplement: supp [file elife-79408-supp-v1.zip › elife_poa_e79408_Figure_5_figure_supplement_1_source_data_1.xlsx]

## Sheet: Sheet1
	Value	Unit	Description
	0.014	s-1	RI HEI10 absorption rate from nucleoplasm
	0.003	s-1	RI HEI10 escape rate into nucleoplasm
	0.42	µm s-1	RI HEI10 absorption rate from SC
	0.075	s-1	RI HEI10 escape rate onto SC
	1		Telomere weighting for RI loading
	13.92		Mean number of SC patches
	1.693		Alpha parameter of patch length gamma distribution
	2.984	µm	Theta parameter of patch length gamma distribution
