# Supplementary figures and images for: Coarsening dynamics can explain meiotic crossover patterning in both the presence and absence of the synaptonemal complex
Source: eLife journal article supplement (doi:10.7554/elife.79408), 2023-02-27

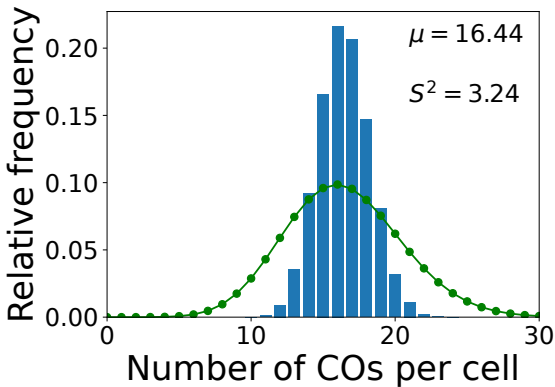

Supplement: supp [file elife-79408-supp-v1.zip]

**A**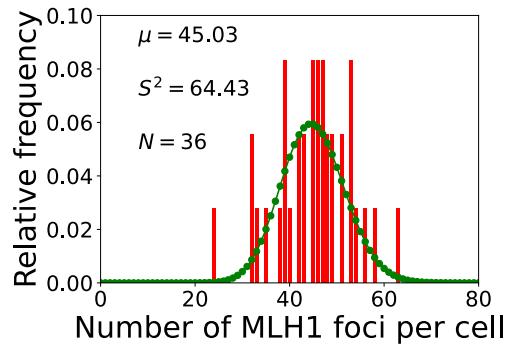**B**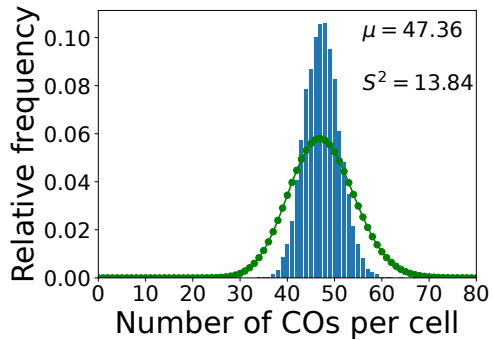**C**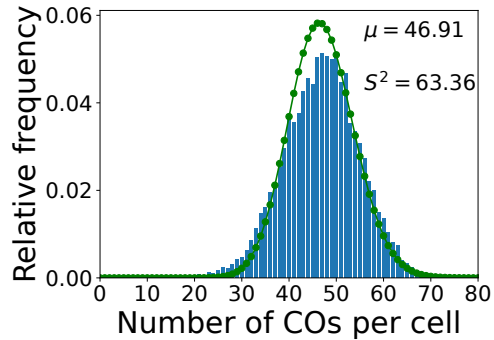

Supplement: supp [file elife-79408-supp-v1.zip]

Nucleoplasmic coarsening model  
(Figure 1F)

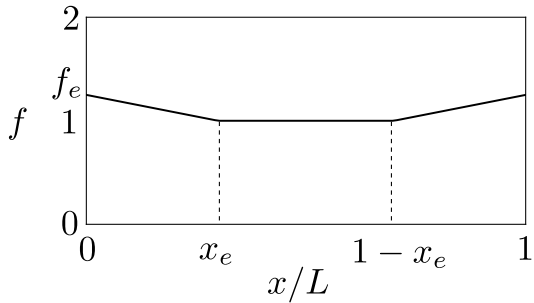

SC-mediated coarsening model  
(Morgan et al., 2021)

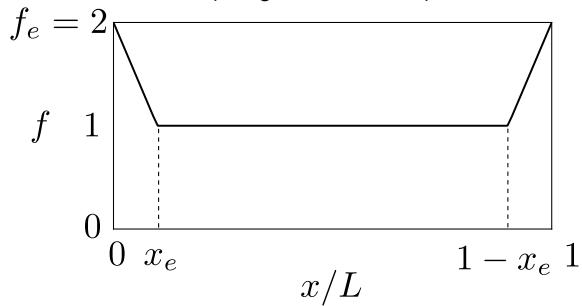

Supplement: supp [file elife-79408-supp-v1.zip]

A WT

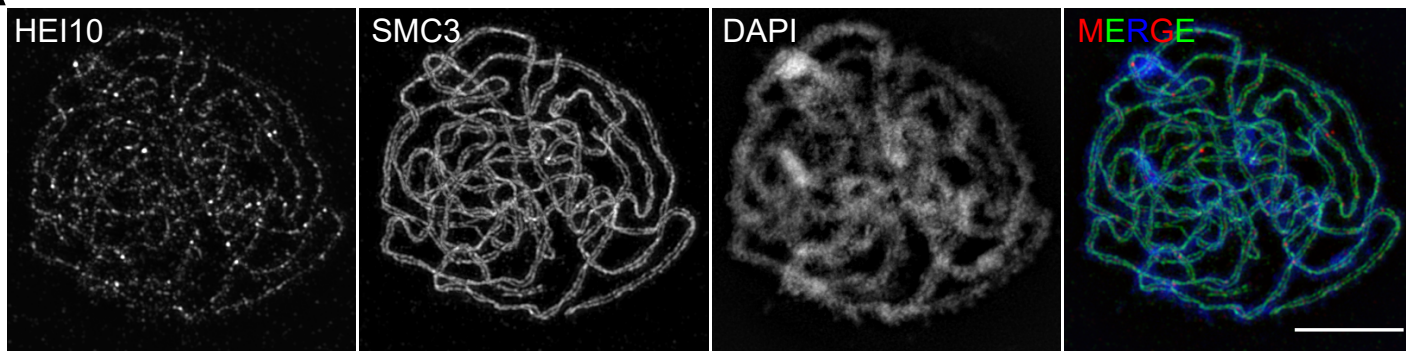

B *zyp1a-2/zyp1b-1*

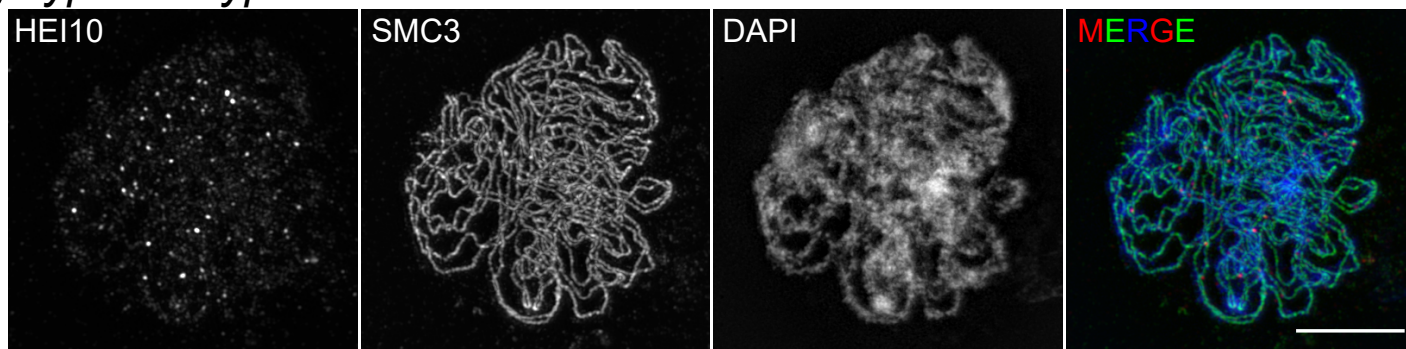

Supplement: supp [file elife-79408-supp-v1.zip]

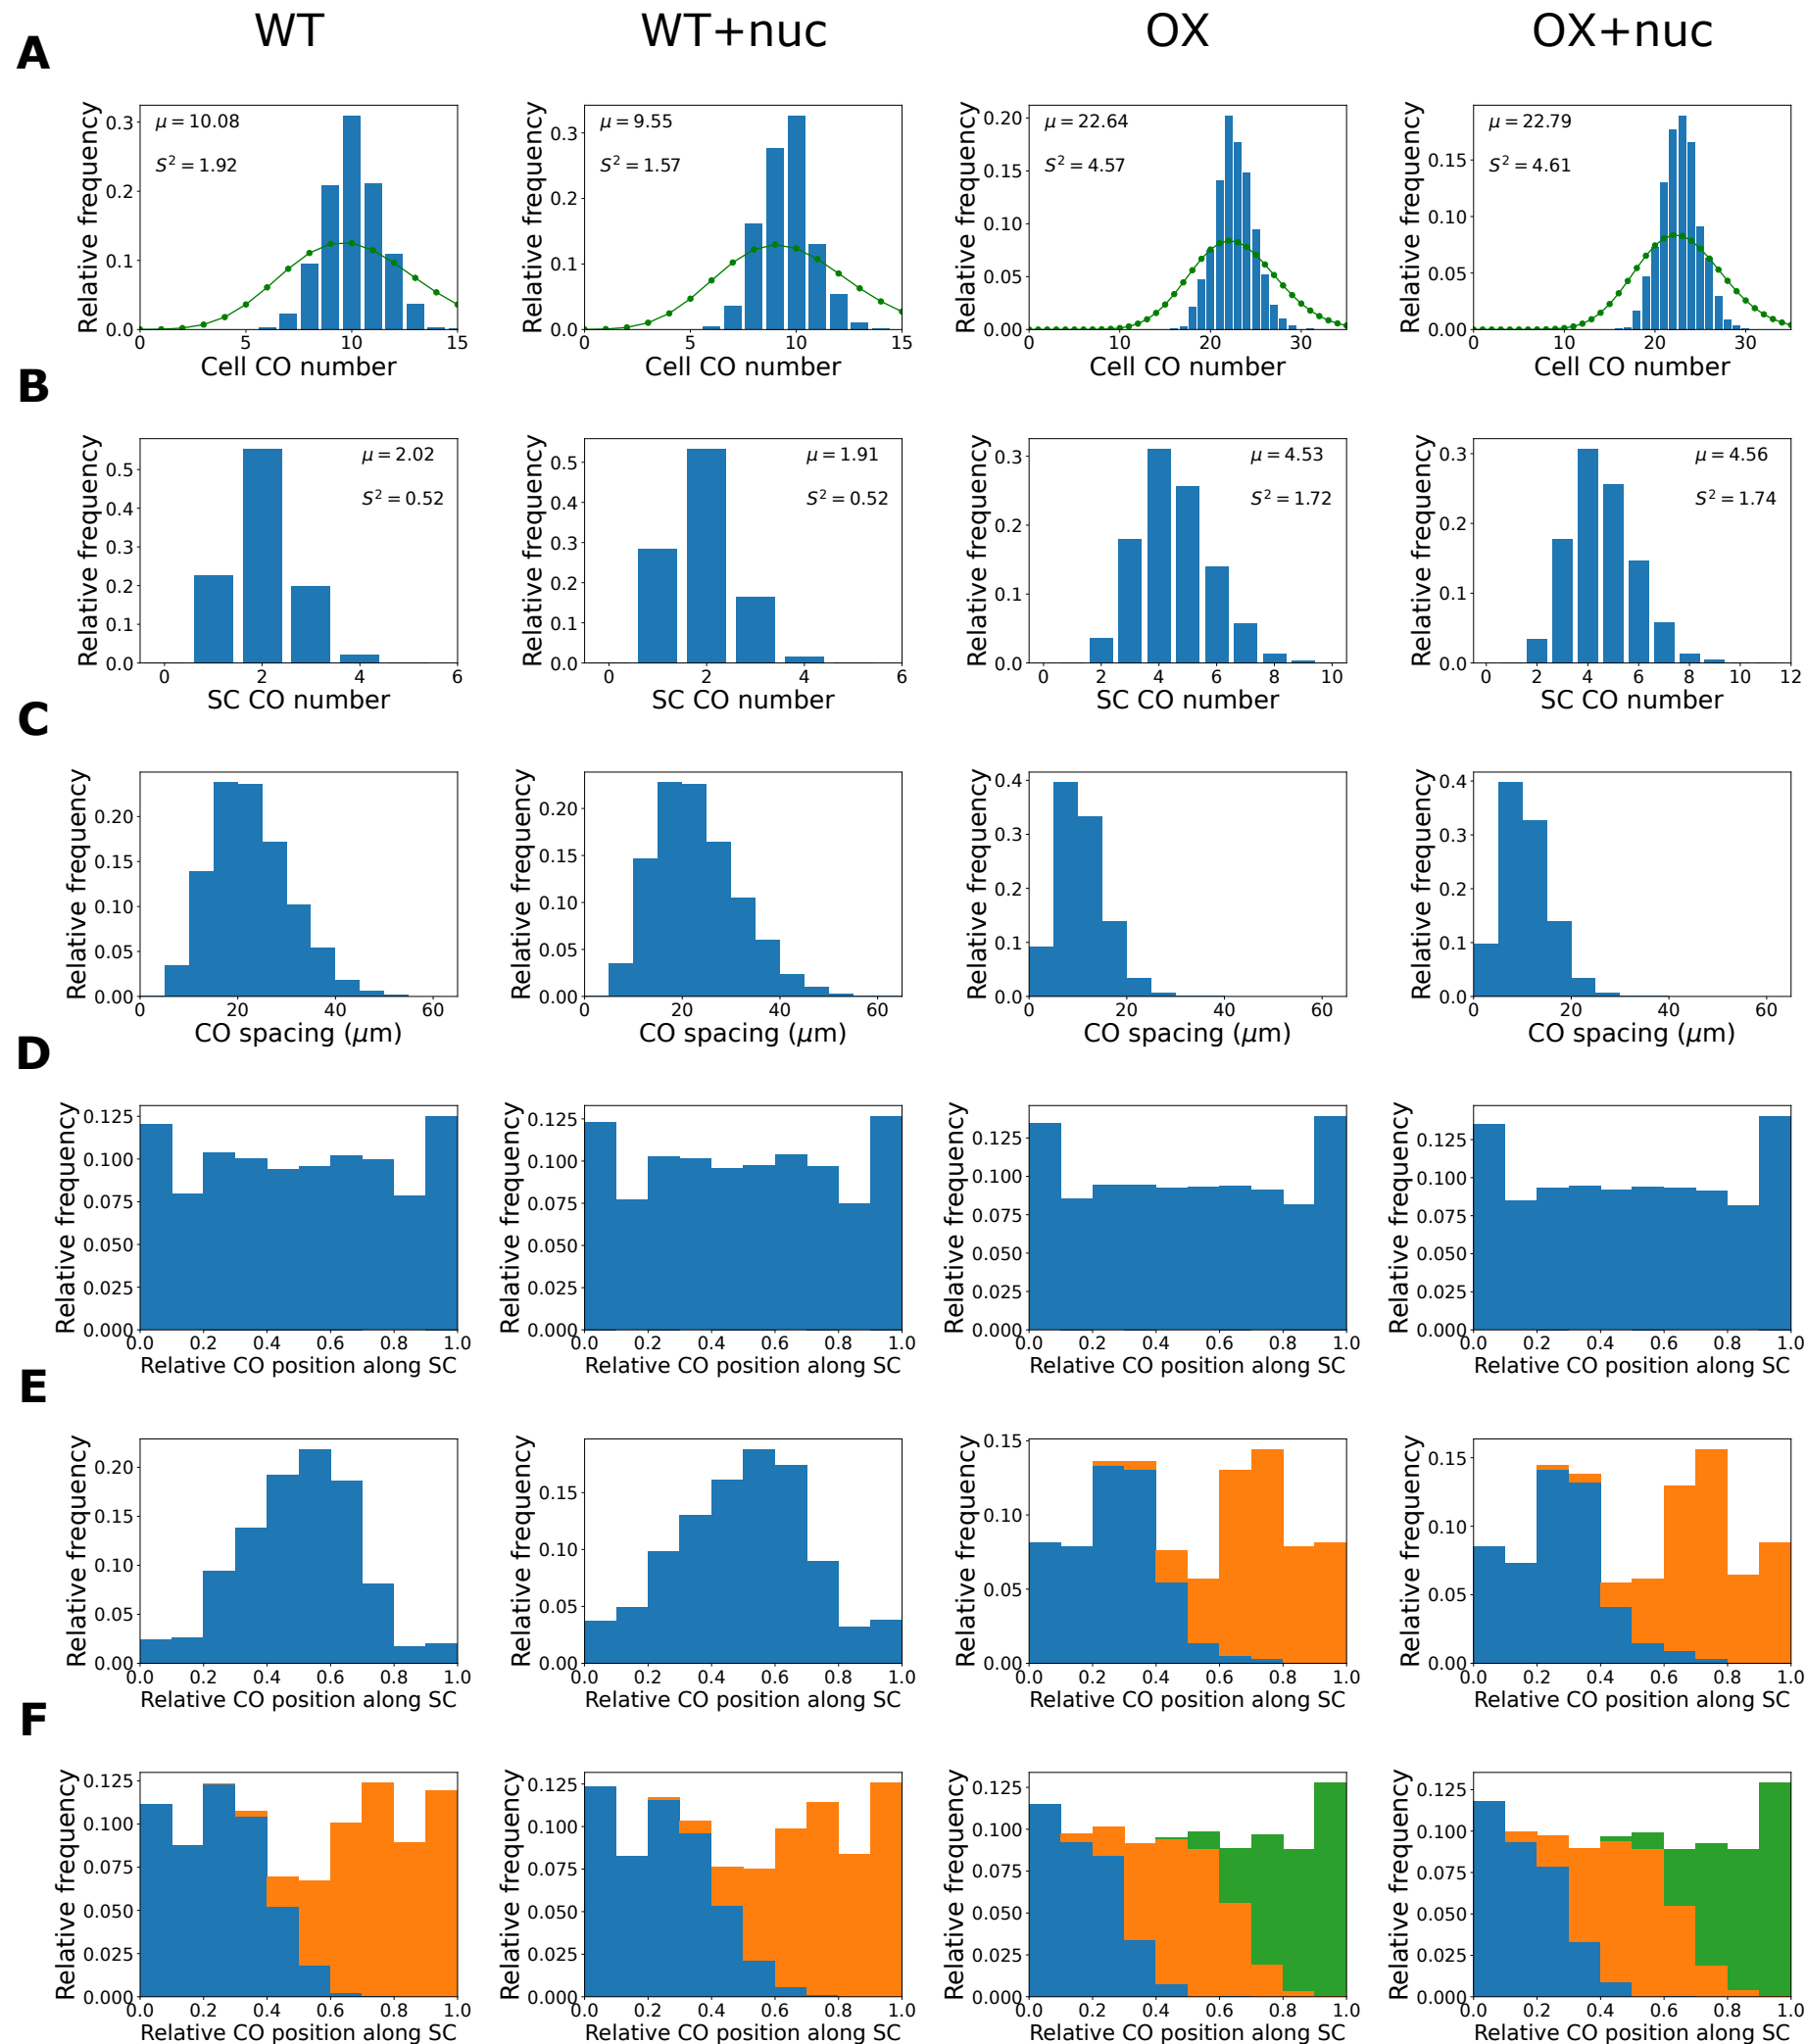

Supplement: supp [file elife-79408-supp-v1.zip › elife_poa_e79408_Figure_4_figure_supplement_2.pdf]
